# Supplementary material for: LIS-doped thin-film nanocomposite membrane adsorbent with low shielding effect for effective lithium recovery from geothermal water
Source: Royal Society of Chemistry journal article supplement (doi:10.1039/d3nj03476c), 2023-01-01
Supplement: d3nj03476c1.pdf [file d3nj03476c1.pdf]

# LIS-doped thin-film nanocomposite membrane adsorbent with low shielding effect for effective lithium recovery from geothermal water

Ju Miao<sup>a</sup>, Feng Guo<sup>a</sup>, Lina Xu<sup>a,\*</sup>, and Tianlong Deng<sup>a,\*</sup>

<sup>a</sup> Key Laboratory of Marine Resource Chemistry and Food Technology (TUST), Ministry of Education, Tianjin Key Laboratory of Marine Resources and Chemistry, Tianjin University of Science and Technology, 300457, Tianjin, China

\*Corresponding authors. Email: [linaxu@tust.edu.cn](mailto:linaxu@tust.edu.cn) and [tldeng@tust.edu.cn](mailto:tldeng@tust.edu.cn)

## Supplementary Information

**Table S1** Composition of geothermal water used in this work.

| Composition                   | pH  | Na <sup>+</sup> | K <sup>+</sup> | Ca <sup>2+</sup> | Li <sup>+</sup> | Cl <sup>-</sup> | B <sub>2</sub> O <sub>3</sub> | Rb <sup>+</sup> | Cs <sup>+</sup> |
|-------------------------------|-----|-----------------|----------------|------------------|-----------------|-----------------|-------------------------------|-----------------|-----------------|
| Content (mg·L <sup>-1</sup> ) | 8.6 | 682.01          | 137.90         | 211.05           | 25.78           | 973.06          | 360.16                        | 3.45            | 17.58           |

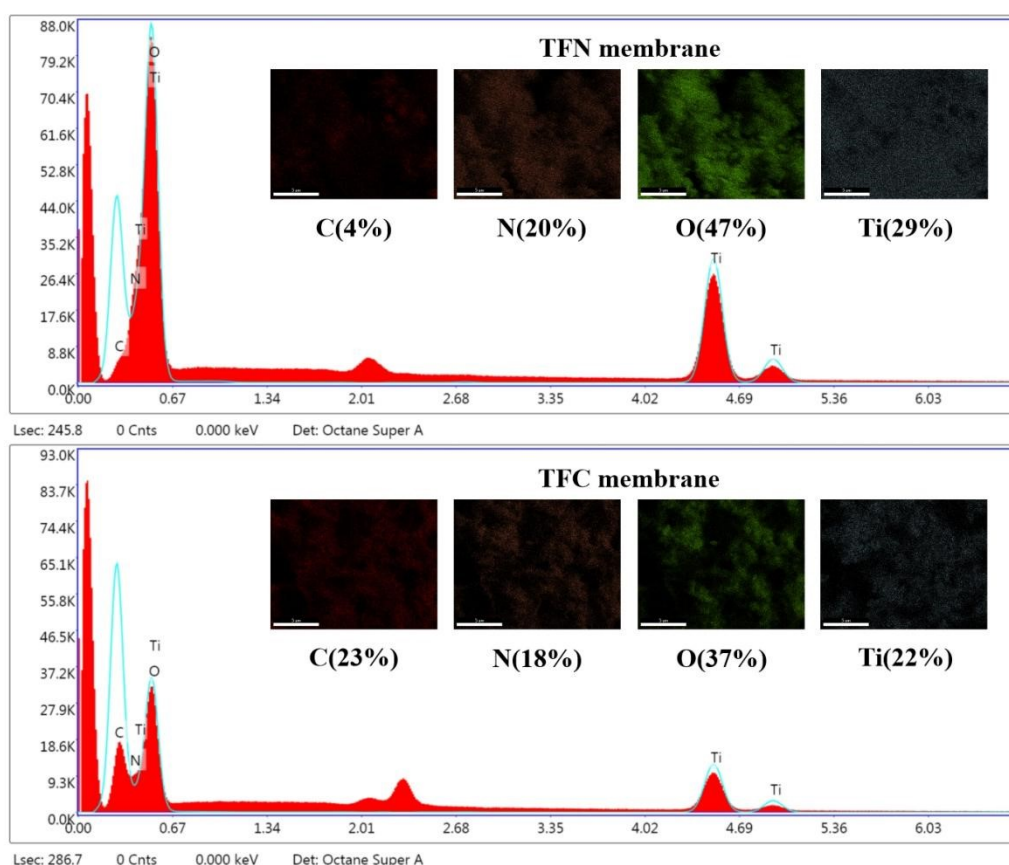

**Figure S1** EDS images of TFN membrane and TFC membrane adsorbent

**Table S2** Elements analyses of TFN and TFC membrane adsorbent by EDS

| Component     | 质量分数(%)      |              |
|---------------|--------------|--------------|
|               | TFN membrane | TFC membrane |
| Carbon (C)    | 25.52        | 47.54        |
| Nitrogen (N)  | 15.55        | 11.44        |
| Oxygen (O)    | 56.70        | 40.07        |
| Titanium (Ti) | 2.23         | 0.95         |

**Table S3** Data analysis of the effect of HTO loading amounts ( $L_a$ ) on the lithium adsorption capacity ( $Q_{Li}$ ) of TFN membrane adsorbent.

| Types/<br>Times          | Data  |       |       |       |       | Data analysis |       |         |
|--------------------------|-------|-------|-------|-------|-------|---------------|-------|---------|
|                          | 1     | 2     | 3     | 4     | 5     | $\bar{x}^a$   | $S^b$ | $RSD^c$ |
| $L_a/g \cdot m^{-2}$     | 18.4  | 18.3  | 18.5  | 18.4  | 18.9  | 18.5          | 0.24  | 1.30%   |
|                          | 19.6  | 19.7  | 19.6  | 19.5  | 19.6  | 19.6          | 0.07  | 0.357%  |
|                          | 24.0  | 23.9  | 23.8  | 24.1  | 24.2  | 24.0          | 0.16  | 0.667%  |
|                          | 29.5  | 29.4  | 29.5  | 29.5  | 29.6  | 29.5          | 0.07  | 0.237%  |
|                          | 32.2  | 32.2  | 32.2  | 32.3  | 32.1  | 32.2          | 0.07  | 0.217%  |
|                          | 35.0  | 35.1  | 35.0  | 35.1  | 35.3  | 35.1          | 0.12  | 0.342%  |
| $Q_{Li}/mg \cdot g^{-1}$ | 22.18 | 22.18 | 22.17 | 22.19 | 22.18 | 22.18         | 0.01  | 0.045%  |
|                          | 13.22 | 13.22 | 13.21 | 13.2  | 13.23 | 13.22         | 0.01  | 0.076%  |
|                          | 19.84 | 19.85 | 19.82 | 19.81 | 19.83 | 19.83         | 0.02  | 0.101%  |
|                          | 24.38 | 24.39 | 24.38 | 24.37 | 24.38 | 24.38         | 0.01  | 0.041%  |
|                          | 24.33 | 24.34 | 24.35 | 24.34 | 24.34 | 24.34         | 0.01  | 0.041%  |
|                          | 24.3  | 24.29 | 24.31 | 24.29 | 24.31 | 24.3          | 0.01  | 0.041%  |

<sup>a</sup>  $\bar{x}$  means the average. <sup>b</sup>  $S$  means the standard deviation. <sup>c</sup>  $RSD$  means the relative standard deviation.

**Table S4** Data analysis of the lithium adsorption capacity ( $Q_{Li}$ ) of TFN membrane adsorbent doped with different types of LIS including lithium titanium oxides-type LIS (HTO), lithium manganese oxides-type LIS (HMnO) and lithium aluminum oxides-type LIS (HAIO).

| Types of LIS/<br>Times |              | Data  |       |       |       |       | Data analysis |       |         |
|------------------------|--------------|-------|-------|-------|-------|-------|---------------|-------|---------|
|                        |              | 1     | 2     | 3     | 4     | 5     | $\bar{x}^a$   | $S^b$ | $RSD^c$ |
| HTO                    | Powdery LIS  | 25.8  | 25.78 | 25.82 | 25.81 | 25.79 | 25.8          | 0.02  | 0.078%  |
|                        | TFN membrane | 24.37 | 24.38 | 24.39 | 24.39 | 24.37 | 24.38         | 0.01  | 0.041%  |
| HMnO                   | Powdery LIS  | 20.83 | 20.83 | 20.84 | 20.8  | 20.8  | 20.82         | 0.02  | 0.096%  |
|                        | TFN membrane | 18.7  | 18.71 | 18.72 | 18.69 | 18.68 | 18.7          | 0.02  | 0.107%  |
| HAIO                   | Powdery LIS  | 5.87  | 5.87  | 5.86  | 5.88  | 5.87  | 5.87          | 0.01  | 0.170%  |
|                        | TFN membrane | 2.29  | 2.29  | 2.3   | 2.31  | 2.26  | 2.29          | 0.02  | 0.873%  |

<sup>a</sup>  $\bar{x}$  means the average. <sup>b</sup>  $S$  means the standard deviation. <sup>c</sup>  $RSD$  means the relative standard deviation.

**Table S5** Adsorption selectivity of TFN membrane adsorbent.

| Feed solution | Parameters                  | Li <sup>+</sup> | Na <sup>+</sup> | K <sup>+</sup> | Cs <sup>+</sup> |
|---------------|-----------------------------|-----------------|-----------------|----------------|-----------------|
| LiCl + NaCl   | $K_d$ (mL·g <sup>-1</sup> ) | 1123.31         | 4.02            | -              | -               |
|               | $\alpha$                    | 1.00            | 279.55          | -              | -               |
| LiCl + KCl    | $K_d$ (mL·g <sup>-1</sup> ) | 1166.97         | -               | 1.43           | -               |
|               | $\alpha$                    | 1.00            | -               | 816.06         | -               |
| LiCl + CsCl   | $K_d$ (mL·g <sup>-1</sup> ) | 1431.76         | -               | -              | 0.08            |
|               | $\alpha$                    | 1.00            | -               | -              | 17889.08        |
